# Supplementary material for: ACEIC: a comprehensive anthropogenic chlorine emission inventory for China
Source: Copernicus journal article supplement (doi:10.5194/acp-24-11521-2024), 2024-10-16
Supplement: Supplementary file 1 [file acp-24-11521-2024-supplement.pdf]

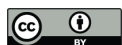

*Supplement of*

## **ACEIC: a comprehensive anthropogenic chlorine emission inventory for China**

**Siting Li et al.**

*Correspondence to:* Yiming Liu ([liuym88@mail.sysu.edu.cn](mailto:liuym88@mail.sysu.edu.cn)) and Qi Fan ([eesfq@mail.sysu.edu.cn](mailto:eesfq@mail.sysu.edu.cn))

The copyright of individual parts of the supplement might differ from the article licence.

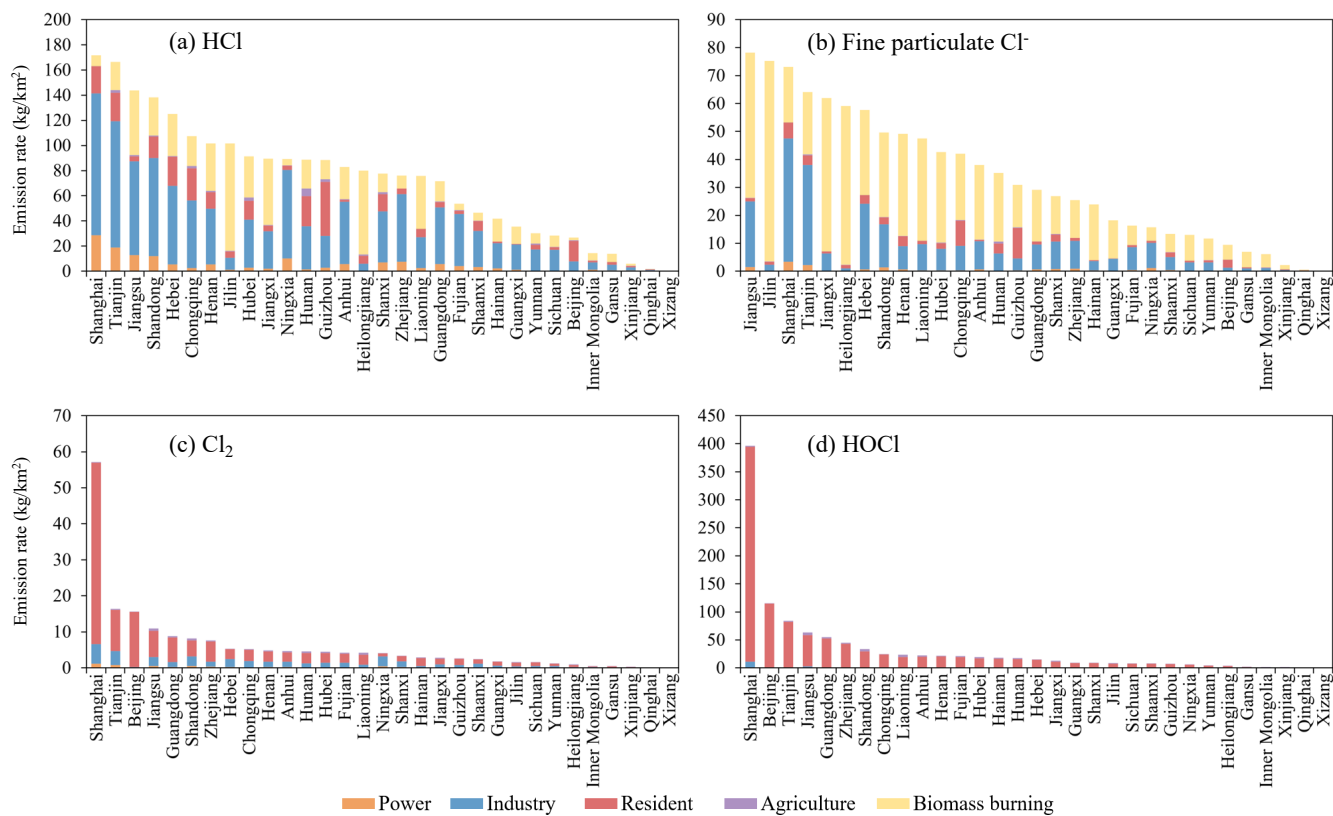

Figure S1 Per-unit-area emissions of HCl (a), fine particulate Cl<sup>-</sup> (b), Cl<sub>2</sub> (c) and HOCl (d) by province.

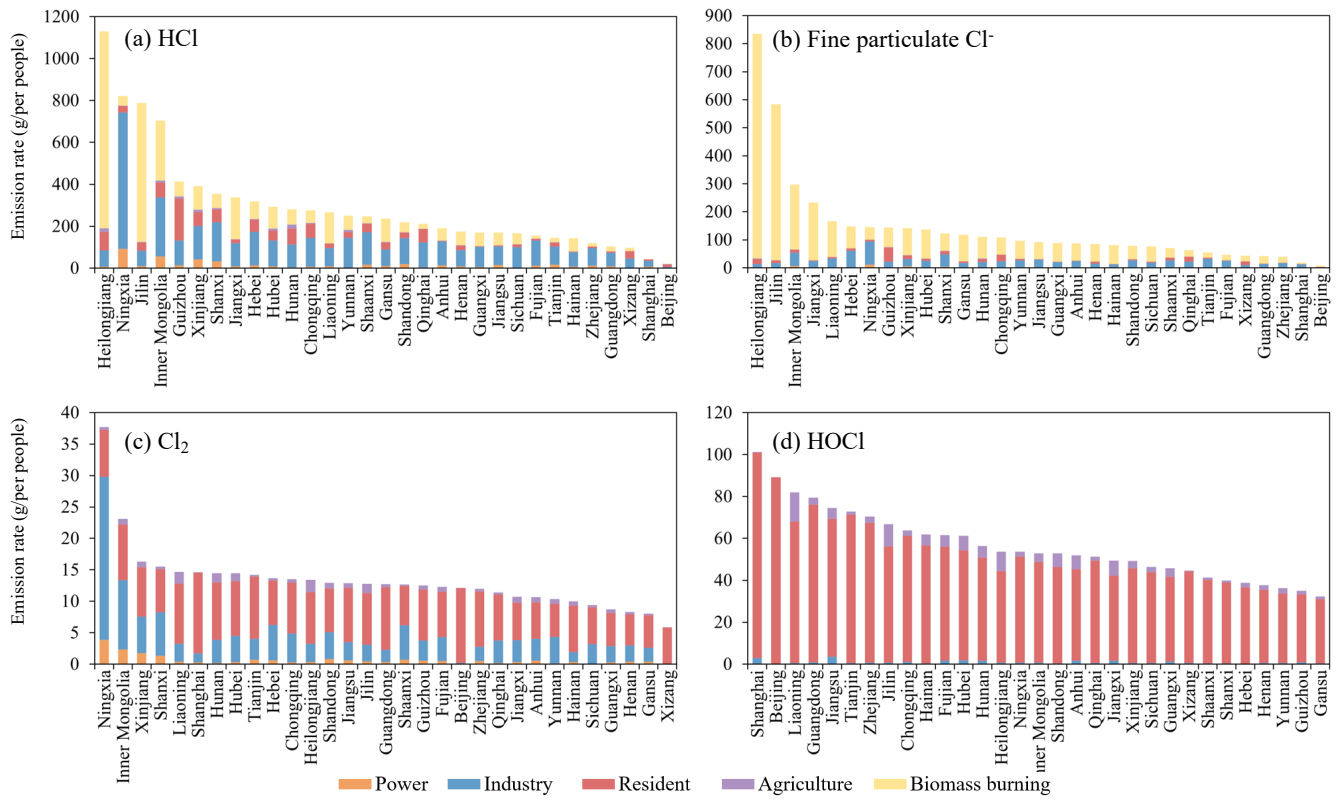

Figure S2 Per-capita emissions of HCl (a), fine particulate Cl<sup>-</sup> (b), Cl<sub>2</sub> (c) and HOCl (d) by province.

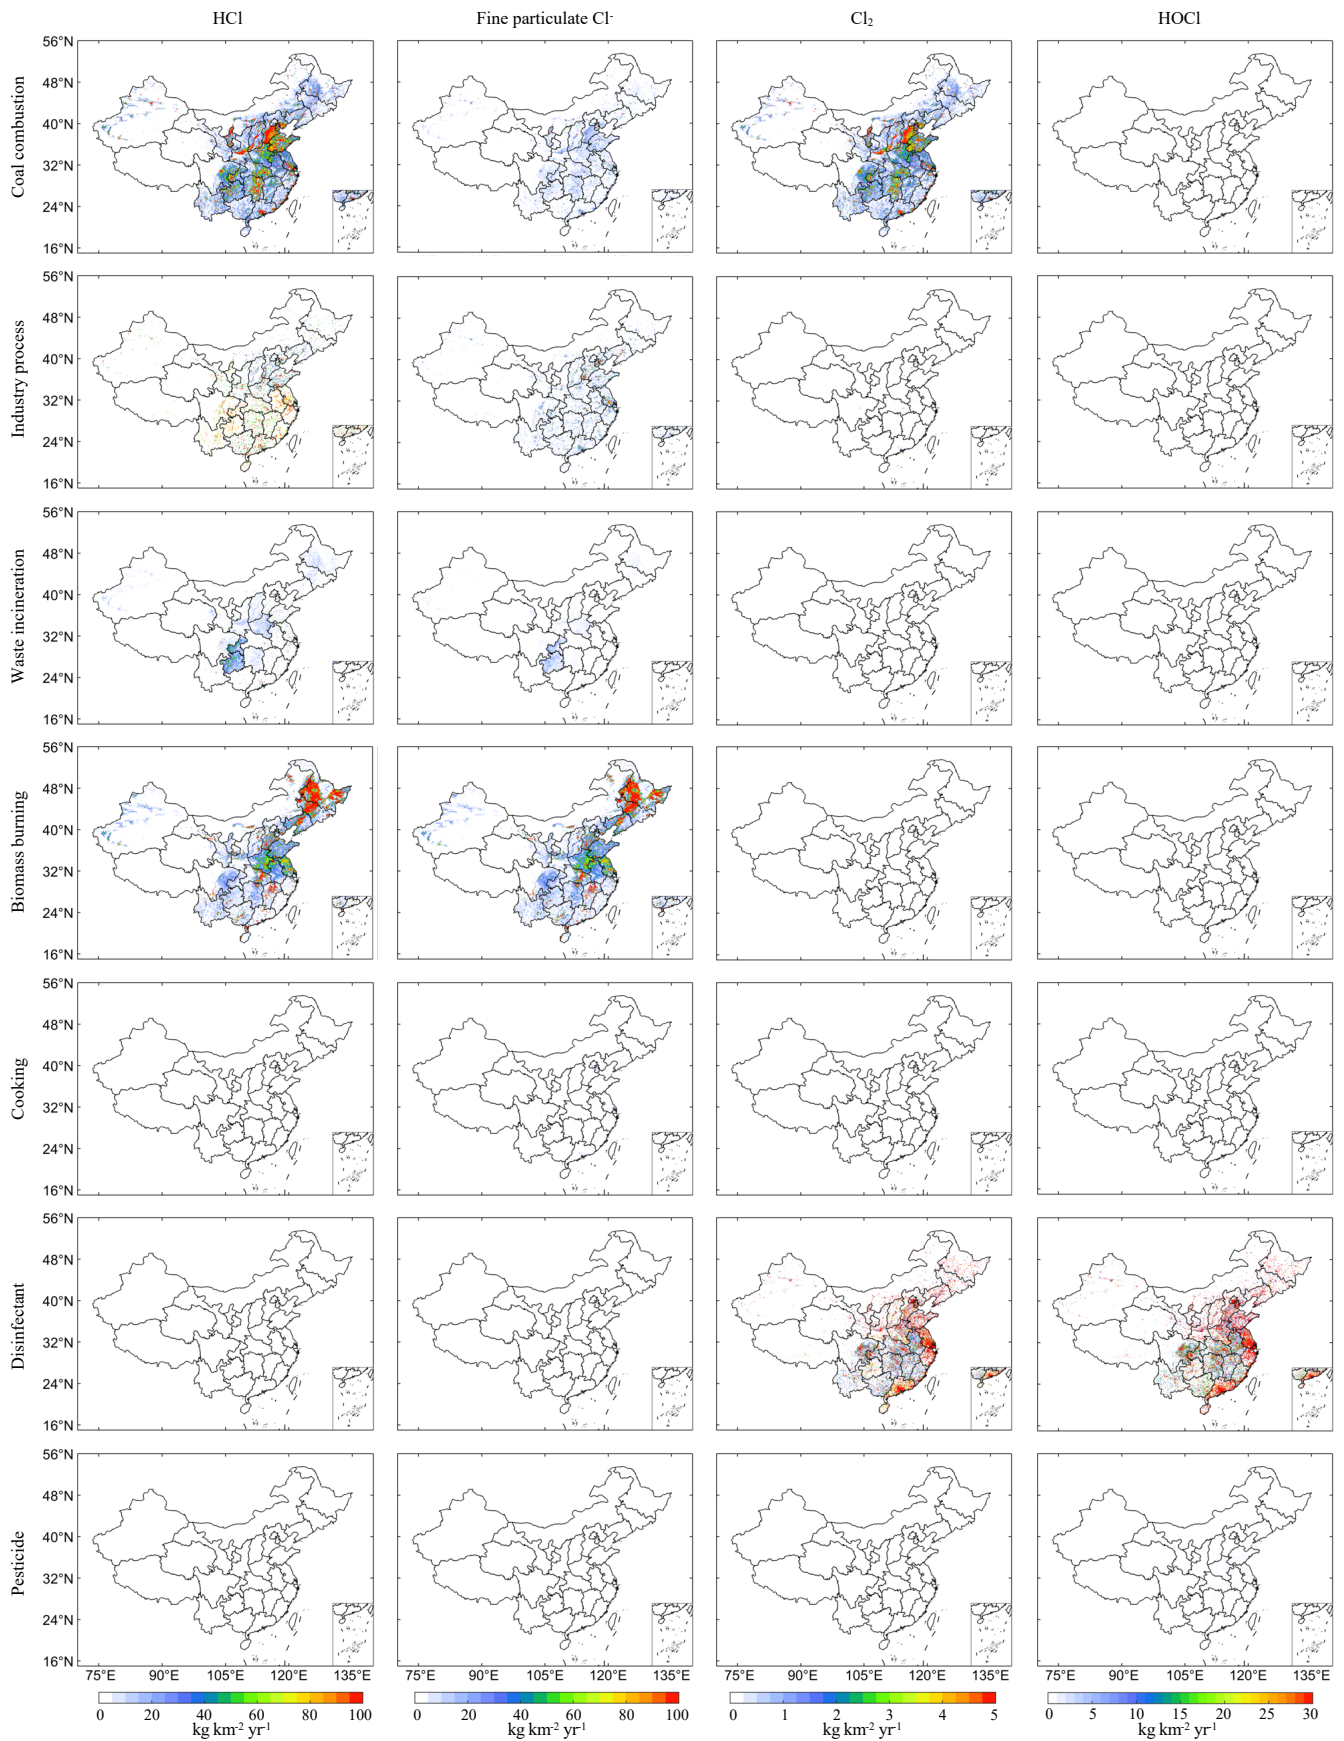

Figure S3 Spatial distribution of anthropogenic chlorine emissions by source category in 2019 at a  $0.1^\circ \times 0.1^\circ$  resolution.

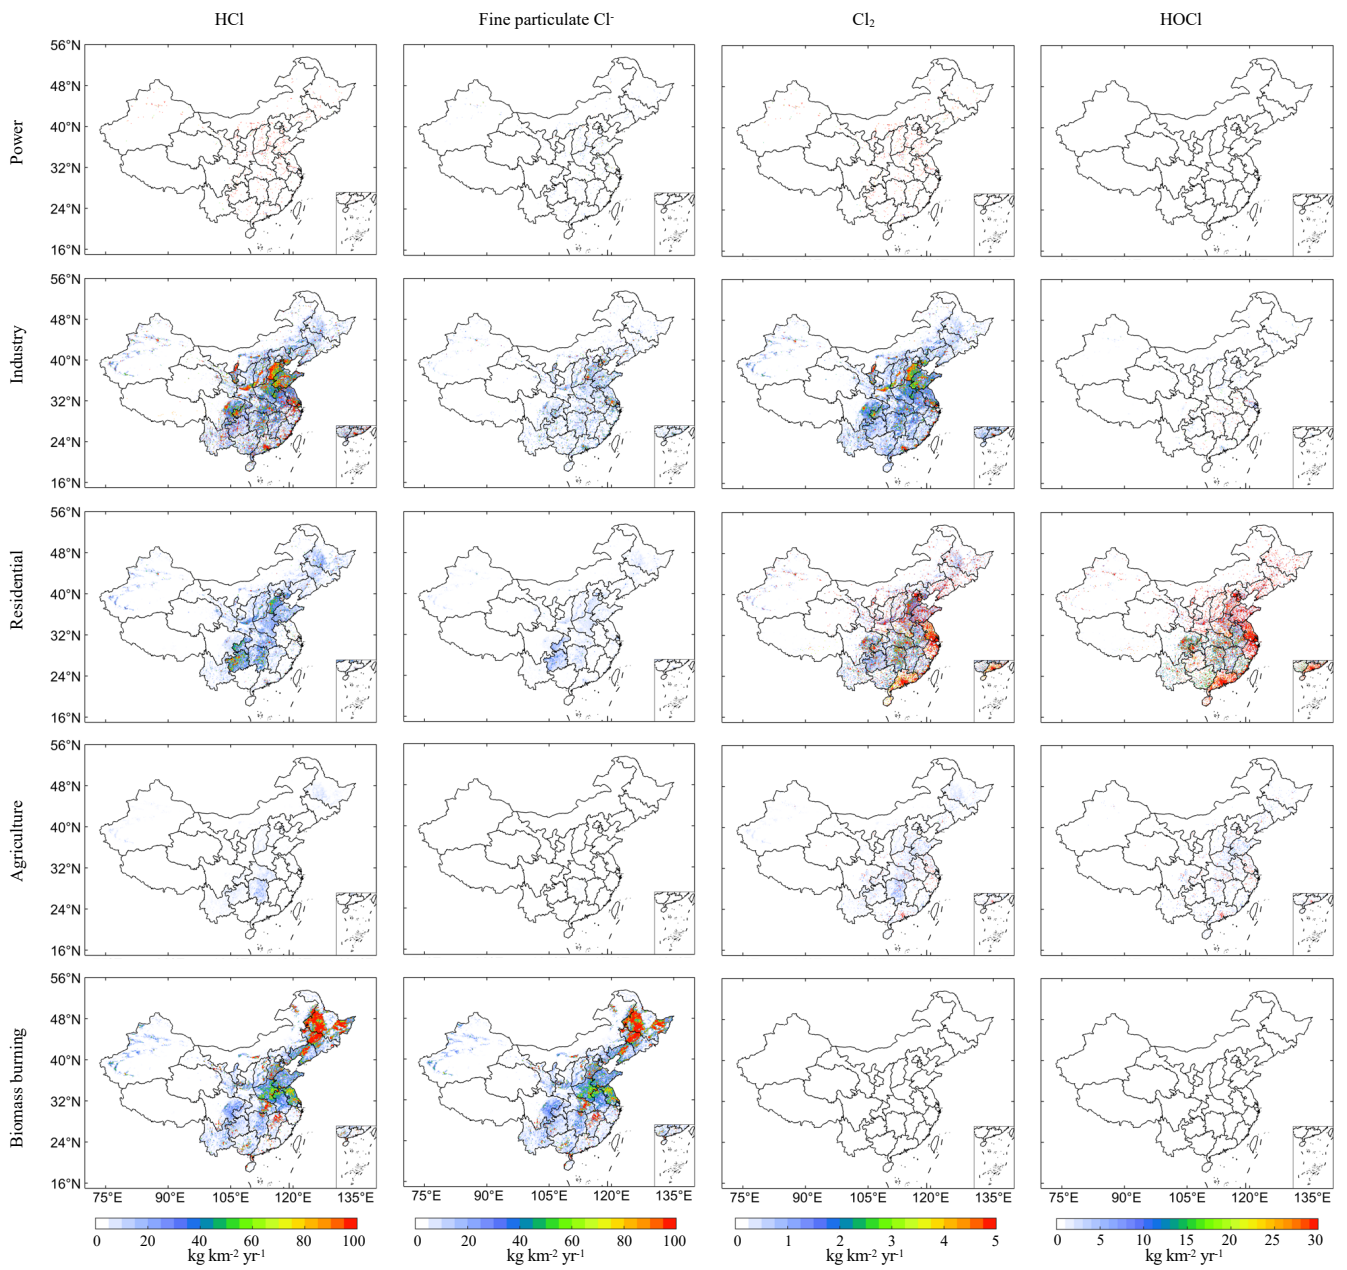

Figure S4 Spatial distribution of anthropogenic chlorine emissions by economic sector in 2019 at a  $0.1^\circ \times 0.1^\circ$  resolution.

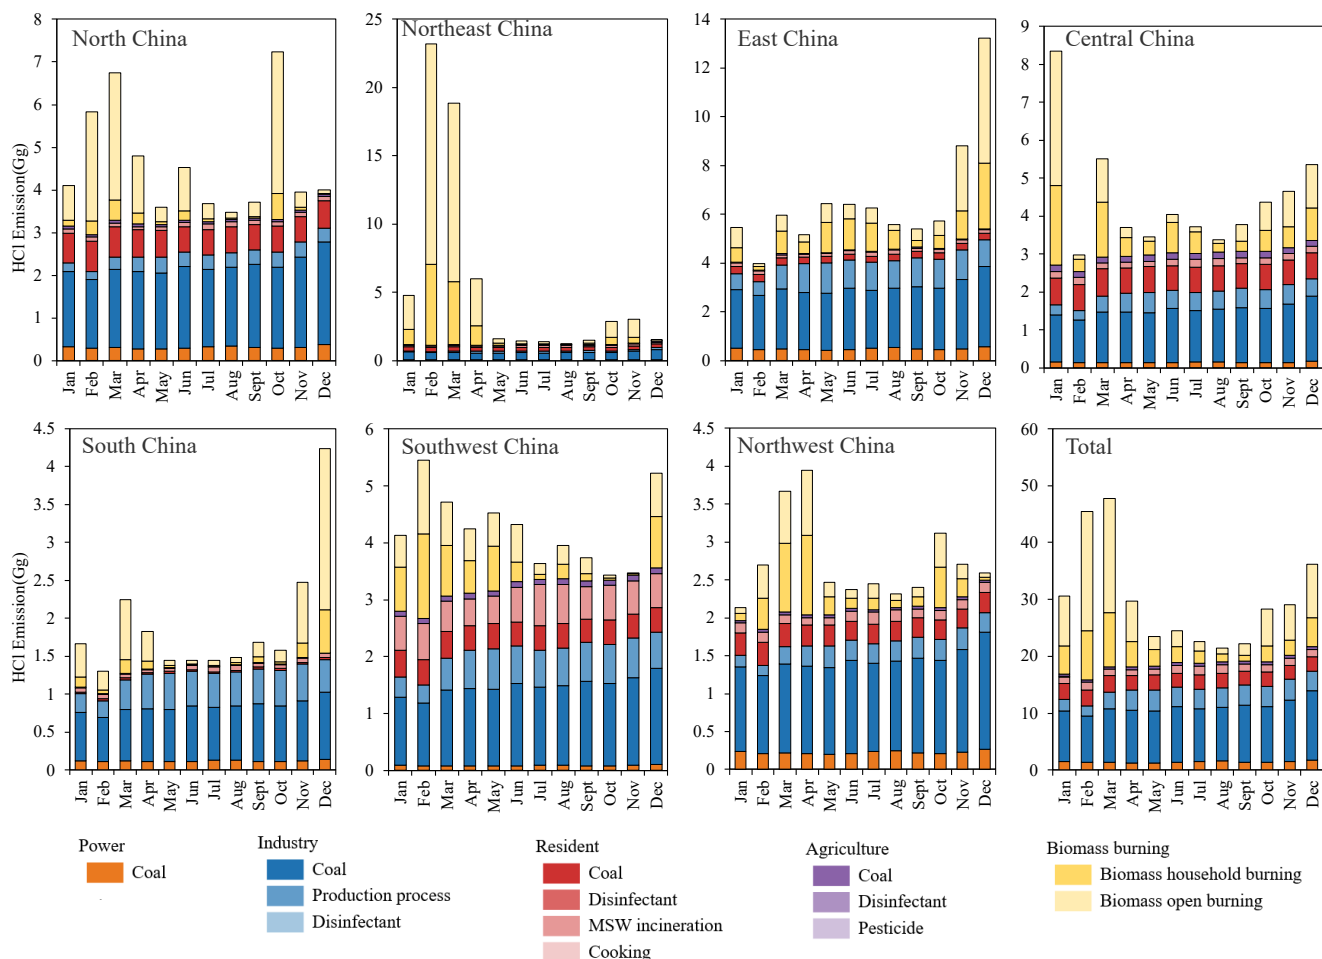

Figure S5 Monthly distribution of HCl emission in different regions in 2019. (North China: Beijing, Tianjin, Hebei, Shanxi, Inner Mongolia. Northeast region: Liaoning, Jilin, Heilongjiang. East China: Shanghai, Jiangsu, Zhejiang, Anhui, Fujian, Jiangxi, Shandong. Central China: Henan, Hubei, Hunan. South China: Guangdong, Guangxi, Hainan. Southwest China: Chongqing, Sichuan, Guizhou, Yunnan, Xizang. Northwest region: Shaanxi, Gansu, Qinghai, Ningxia, Xinjiang)

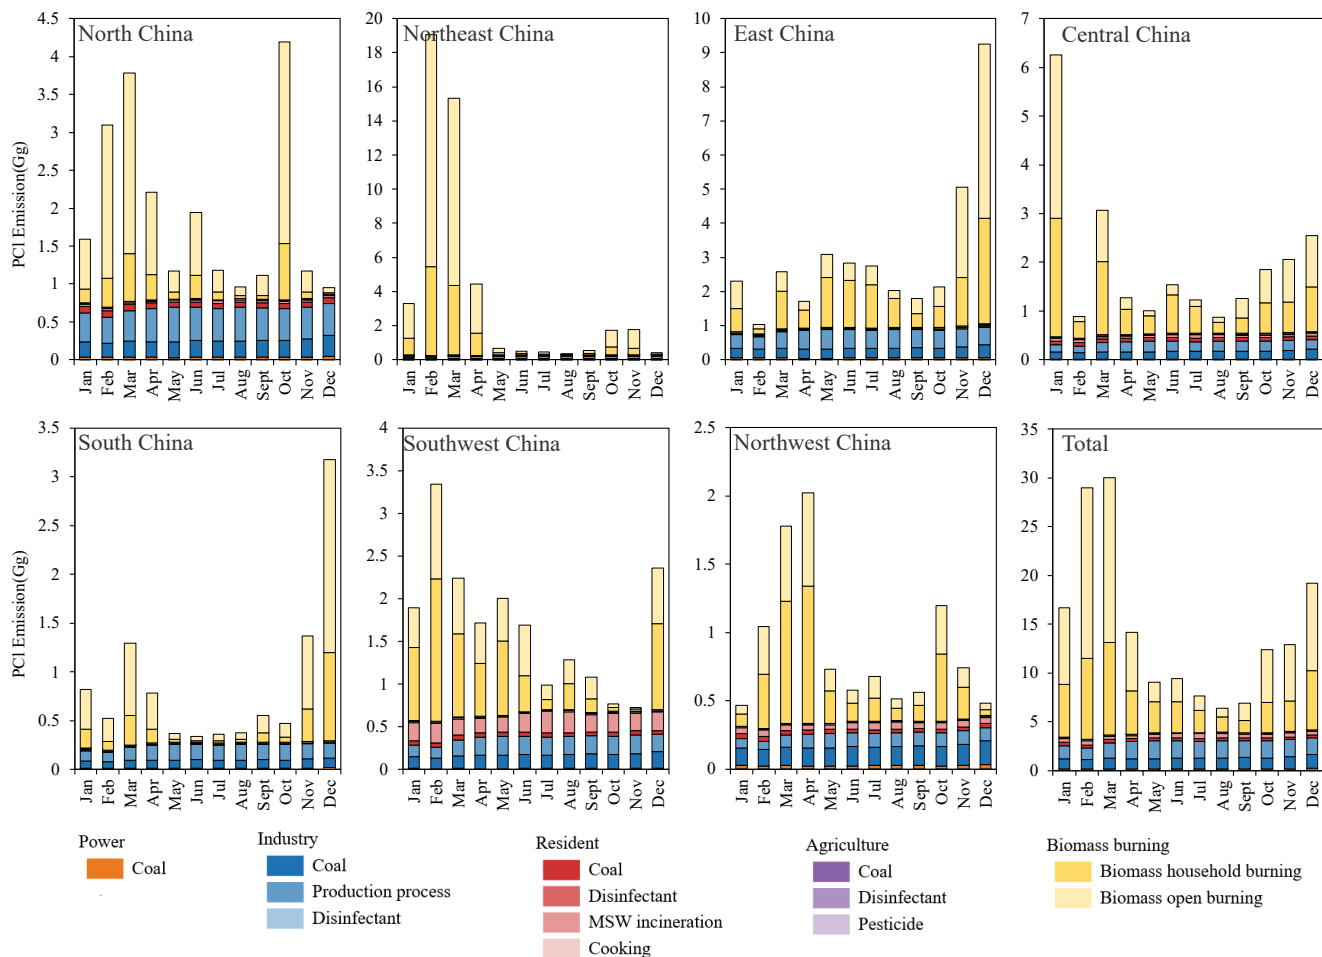

Figure S6 Monthly distribution of pCl emission in different regions in 2019. (North China: Beijing, Tianjin, Hebei, Shanxi, Inner Mongolia. Northeast region: Liaoning, Jilin, Heilongjiang. East China: Shanghai, Jiangsu, Zhejiang, Anhui, Fujian, Jiangxi, Shandong. Central China: Henan, Hubei, Hunan. South China: Guangdong, Guangxi, Hainan. Southwest China: Chongqing, Sichuan, Guizhou, Yunnan, Xizang. Northwest region: Shaanxi, Gansu, Qinghai, Ningxia, Xinjiang)

Table S1 The aggregation of 7 source categories from 41 specific sources.

| Source                        | Sub-source                                       | Thi-source               |
|-------------------------------|--------------------------------------------------|--------------------------|
| coal combustion               | Power coal combustion                            | Power plant              |
|                               | Industrial coal combustion                       | Heat supply              |
|                               |                                                  | Industry                 |
|                               |                                                  | Construction industry    |
|                               | Residential coal combustion                      | Residents                |
|                               |                                                  | Traffic                  |
|                               |                                                  | Business                 |
| Other                         |                                                  |                          |
| Agricultural coal combustion  |                                                  |                          |
| Industrial production process | Cement production                                |                          |
|                               | Iron production                                  |                          |
|                               | Steel production                                 |                          |
|                               | HCl production                                   |                          |
|                               | Flat glass production                            |                          |
| Waste incineration            | MSW (municipal solid waste) incineration station |                          |
|                               | MSW open burning                                 |                          |
|                               | Medical waste incineration                       |                          |
| Biomass burning               | Biomass household burning                        | Crop                     |
|                               |                                                  | Firewood                 |
|                               | Biomass open burning                             |                          |
| Cooking                       | Household                                        |                          |
|                               | Restaurant                                       |                          |
|                               | Canteen                                          | School<br>Unit           |
| Disinfectant                  | Cooling tower                                    |                          |
|                               | Water treatment                                  |                          |
|                               | Waste water treatment                            | Domestic sewage          |
|                               |                                                  | Medical sewage           |
|                               | Swimming pool                                    | Public swimming pool     |
|                               | Environmental disinfection                       | Hospital                 |
|                               |                                                  | Toilet-Public toilet     |
|                               |                                                  | Toilet-Domestic toilet   |
|                               |                                                  | Breeding-Pig farming     |
|                               |                                                  | Breeding-Poultry farming |
|                               | Breeding-Aquaculture                             |                          |
|                               | Tap water use                                    | Car washing              |
|                               |                                                  | Lawn watering            |
| Road watering                 |                                                  |                          |
| Water leakage                 |                                                  |                          |
| Pesticide                     | Insecticide                                      |                          |
|                               | Herbicide                                        |                          |



Table S2 The aggregation of 5 economic sectors from 41 specific sources.

| Sector             | Sub-sector                        | Thi-sector                 | Four-sector            |  |
|--------------------|-----------------------------------|----------------------------|------------------------|--|
| Power              | Power coal combustion             | Power plant                |                        |  |
| Industry           | Industrial coal combustion        | Heat supply                |                        |  |
|                    |                                   | Industry                   |                        |  |
|                    | Industrial production process     | Construction industry      |                        |  |
|                    |                                   | Cement production          |                        |  |
|                    |                                   | Iron production            |                        |  |
|                    |                                   | Steel production           |                        |  |
|                    |                                   | HCl production             |                        |  |
|                    |                                   | Flat glass production      |                        |  |
|                    |                                   | Cooling tower              |                        |  |
|                    |                                   | Residents                  |                        |  |
| Residential        | Residential coal combustion       | Traffic                    |                        |  |
| Residential        | Residential usage of disinfectant | Business                   |                        |  |
|                    |                                   | Other                      |                        |  |
|                    |                                   | Water treatment            |                        |  |
|                    |                                   | Waste water treatment      | Domestic sewage        |  |
|                    |                                   |                            | Medical sewage         |  |
|                    |                                   | Swimming pool              | Public swimming pool   |  |
|                    |                                   | Environmental disinfection | Hospital               |  |
|                    |                                   |                            | Toilet-Public toilet   |  |
|                    |                                   |                            | Toilet-Domestic toilet |  |
|                    |                                   | Tap water use              | Car washing            |  |
| Waste incineration | Waste incineration station        | Lawn watering              |                        |  |
|                    |                                   | Road watering              |                        |  |
|                    |                                   | Water leakage              |                        |  |
| Waste incineration | Waste incineration station        | MSW open burning           |                        |  |
|                    |                                   |                            |                        |  |

|                 |                                    |                            |        |
|-----------------|------------------------------------|----------------------------|--------|
|                 |                                    | Medical waste incineration |        |
|                 | Cooking                            | Household                  |        |
|                 |                                    | Restaurant                 |        |
|                 |                                    | Canteen                    | School |
|                 |                                    |                            | Unit   |
| Agriculture     | Agricultural coal combustion       |                            |        |
|                 | Agricultural usage of disinfectant | Pig                        |        |
|                 |                                    | Poultry                    |        |
|                 |                                    | Aquaculture                |        |
|                 | Agricultural usage of pesticide    | Insecticide                |        |
|                 |                                    | Herbicide                  |        |
| Biomass burning | Biomass household burning          | Crop                       |        |
|                 | Biomass open burning               | Firewood                   |        |

Table S3 Sources of activity data.

| Source category       | Sub-category                    | Activity level data                                                                                                                                                | Source                                                                                                                                       |                                                                                                  |
|-----------------------|---------------------------------|--------------------------------------------------------------------------------------------------------------------------------------------------------------------|----------------------------------------------------------------------------------------------------------------------------------------------|--------------------------------------------------------------------------------------------------|
| Coal combustion       | Power                           | Coal consumption of power plant                                                                                                                                    | China Energy Statistical Yearbook 2020 (National Bureau of Statistics, 2020a)                                                                |                                                                                                  |
|                       |                                 | Coal consumption for heat supply                                                                                                                                   |                                                                                                                                              |                                                                                                  |
|                       |                                 | Coal consumption of industry                                                                                                                                       |                                                                                                                                              |                                                                                                  |
|                       | Industrial                      | Coal consumption of construction industry                                                                                                                          |                                                                                                                                              |                                                                                                  |
|                       |                                 | Coal consumption of residents                                                                                                                                      |                                                                                                                                              |                                                                                                  |
|                       |                                 | Coal consumption of traffic                                                                                                                                        |                                                                                                                                              |                                                                                                  |
|                       |                                 | Coal consumption of business                                                                                                                                       |                                                                                                                                              |                                                                                                  |
|                       | Residential                     | Coal consumption of other                                                                                                                                          |                                                                                                                                              |                                                                                                  |
|                       |                                 | Coal consumption of agriculture                                                                                                                                    |                                                                                                                                              |                                                                                                  |
|                       | Agriculture                     | Cement production                                                                                                                                                  |                                                                                                                                              | China Industrial Statistics Yearbook 2020 (National Bureau of Statistics, 2020f)                 |
| Iron production       |                                 |                                                                                                                                                                    |                                                                                                                                              |                                                                                                  |
| Steel production      |                                 |                                                                                                                                                                    |                                                                                                                                              |                                                                                                  |
| Flat glass production |                                 |                                                                                                                                                                    |                                                                                                                                              |                                                                                                  |
| HCl production        | Production of hydrochloric acid | National Bureau of Statistics<br>( <a href="https://m.sohu.com/a/335035620_775892/?pvid=000115_3w_a">https://m.sohu.com/a/335035620_775892/?pvid=000115_3w_a</a> ) |                                                                                                                                              |                                                                                                  |
| Waste incineration    | MSW incineration station        | Waste incineration amount                                                                                                                                          | China Urban–Rural Construction Statistical Yearbook 2020 (National Bureau of Statistics, 2020h)                                              |                                                                                                  |
|                       | MSW open burning                | Population                                                                                                                                                         |                                                                                                                                              |                                                                                                  |
|                       | Medical waste incineration      | Waste disposal rate                                                                                                                                                |                                                                                                                                              |                                                                                                  |
| Biomass burning       | Household burning-Firewood      | Medical waste incineration amount                                                                                                                                  | Ministry of Health ( <a href="https://www.reportic.com/article/20200506/6615.html">https://www.reportic.com/article/20200506/6615.html</a> ) |                                                                                                  |
|                       |                                 | Rural population                                                                                                                                                   |                                                                                                                                              |                                                                                                  |
|                       | Household burning-Crop          | Rural household size                                                                                                                                               |                                                                                                                                              | China Population and Employment Statistical Yearbook 2020 (National Bureau of Statistics, 2020e) |
|                       |                                 | Crop yield                                                                                                                                                         |                                                                                                                                              |                                                                                                  |
| Cooking               | Household                       | Crop yield                                                                                                                                                         | China Rural Statistical Yearbook 2020 (National Bureau of Statistics, 2020g)                                                                 |                                                                                                  |
|                       |                                 | Population                                                                                                                                                         |                                                                                                                                              |                                                                                                  |
|                       | Restaurant                      | Household size                                                                                                                                                     |                                                                                                                                              | China Population and Employment Statistical Yearbook 2020 (National Bureau of Statistics, 2020e) |
|                       |                                 | Number of restaurants                                                                                                                                              | Gaode <sup>3</sup> POI (point of interest) data                                                                                              |                                                                                                  |

|                            |                      |                                                  |                                                                                                                                                   |
|----------------------------|----------------------|--------------------------------------------------|---------------------------------------------------------------------------------------------------------------------------------------------------|
|                            | Canteen-School       | Number of students                               | China Education Statistics Yearbook 2020 (National Bureau of Statistics, 2020b)                                                                   |
|                            |                      | Number of teaching staff                         |                                                                                                                                                   |
|                            |                      | Number of public institutions                    |                                                                                                                                                   |
|                            | Canteen-Unit         | Number of organizations                          | National Bureau of Statistics ( <a href="https://data.stats.gov.cn/easyquery.htm?cn=E0103">https://data.stats.gov.cn/easyquery.htm?cn=E0103</a> ) |
|                            |                      | Industrial water consumption                     | China Environmental Statistics Yearbook 2020 (National Bureau of Statistics, 2020e)                                                               |
|                            |                      | Tap water supply                                 | China Urban-Rural Construction Statistical Yearbook 2020 (National Bureau of Statistics, 2020h)                                                   |
| Waste water treatment      | Medical sewage       | Number of hospital beds                          | China Health Statistics Yearbook 2020 (National Health Commission of the People's Republic of China, 2020)                                        |
|                            |                      | Sewage treatment capacity                        | China Urban-Rural Construction Statistical Yearbook 2020 (National Bureau of Statistics, 2020h)                                                   |
| Swimming pool              | Public Swimming pool | Number of swimming pools                         | General Administration of Sport of China                                                                                                          |
|                            |                      | Number of cars                                   | China Statistical Yearbook 2020 (National Bureau of Statistics, 2020d)                                                                            |
|                            |                      | Afforested area                                  |                                                                                                                                                   |
| Tap water use              | Road watering        | Road area                                        | China Urban-Rural Construction Statistical Yearbook 2020 (National Bureau of Statistics, 2020h)                                                   |
|                            |                      | Leakage water volume                             |                                                                                                                                                   |
|                            |                      | Number of hospitals                              | China Health Statistics Yearbook 2020 (National Health Commission of the People's Republic of China, 2020)                                        |
| Environmental disinfection | Hospital             | Total health expenditure in 2018                 | China Health Statistics Yearbook 2008 (National Health Commission of the People's Republic of China, 2008)                                        |
|                            |                      | Total health expenditure in 2007                 |                                                                                                                                                   |
|                            |                      | Number on hand at the end of the pig year        |                                                                                                                                                   |
|                            | Breeding             | Number of poultry on hand at the end of the year | China Rural Statistical Yearbook 2020 (National Bureau of Statistics, 2020g)                                                                      |
|                            |                      | Aquaculture area                                 |                                                                                                                                                   |
|                            |                      | Number of public toilets                         | China Urban-Rural Construction Statistical Yearbook 2020 (National Bureau of Statistics, 2020h)                                                   |
| Pesticide                  | Insecticide          | Pesticide usage                                  |                                                                                                                                                   |
|                            |                      | Herbicide                                        | China Rural Statistical Yearbook 2020 (National Bureau of Statistics, 2020g)                                                                      |

Table S4 Emission factor of HCl from different sources

| Source category               | Sub-category                    | Emission factor | Reference                                            |
|-------------------------------|---------------------------------|-----------------|------------------------------------------------------|
| Industrial production process | Cement production (g/t)         | 15.49           | Yi et al. (2020); Zheng et al. (2018)                |
|                               | Iron production (g/t)           | 0.57            | Yi et al. (2020); Zheng et al. (2018)                |
|                               | Steel production (g/t)          | 0.76            | Yi et al. (2020); Zheng et al. (2018)                |
|                               | HCl production (g/kg)           | 0.08            | Yi et al. (2020); Zheng et al. (2018)                |
|                               | Flat glass production (g/t)     | 11.87           | Sepa (2011); Wang et al. (2014); Zheng et al. (2018) |
| Waste incineration            | MSW incineration station (g/kg) | 0.0192          | Fu et al. (2022)                                     |
|                               | MSW open burning (g/kg)         | 3.58            | Fu et al. (2018)                                     |
| Biomass burning               | Rice straw (g/kg)               | 0.44            | Stockwell et al. (2014)                              |
|                               | Wheat straw (g/kg)              | 0.60            | Stockwell et al. (2014)                              |
|                               | Other crop straw (g/kg)         | 0.52            | Yi et al. (2021)                                     |
|                               | Firewood (g/kg)                 | 0.06            | Yi et al. (2021)                                     |

Table S5 Emission factor of fine particulate Cl<sup>-</sup> from different sources

| Source category               | Sub-category             | Emission factor (g/kg) | Reference                              | Cl <sup>-</sup> in PM <sub>2.5</sub> (%) | Reference                |
|-------------------------------|--------------------------|------------------------|----------------------------------------|------------------------------------------|--------------------------|
| Industrial production process | Cement production        | 0.48                   | Yi et al. (2020); Zheng et al. (2018)  | 0.73                                     | Yi et al. (2020)         |
|                               | Iron production          | 0.16                   | Yi et al. (2020); Zheng et al. (2018)  | 3.54                                     | Yi et al. (2020)         |
|                               | Steel production         | 0.19                   | Yi et al. (2020); Zheng et al. (2018)  | 3.54                                     | Yi et al. (2020)         |
|                               | Flat glass production    | 0.523                  | Pan et al. (2015); Zheng et al. (2018) | 2                                        | Wen et al. (2019)        |
| Waste incineration            | MSW incineration station | 0.0109                 | Fu et al. (2022)                       | 13.8                                     | Wiedinmyer et al. (2014) |
|                               | MSW open burning         | 9.8                    | Wiedinmyer et al. (2014)               | 13.8                                     | Wiedinmyer et al. (2014) |

Table S6 The proportion of medical waste components and HCl release rate

|                         | Plastics | Glass | Organic waste | Rubber | Wood | Fabric | Metal | Reference           |
|-------------------------|----------|-------|---------------|--------|------|--------|-------|---------------------|
| Component (%)           | 57.11    | 17.79 | 10.21         | 4      | 3.21 | 1.28   | 0.51  | Zhang (2018)        |
| HCl release rate (g/kg) | 28.3     | 0.081 | 3.6           | 21.9   | 0.5  | 4.82   | 0     | Zhang et al. (2022) |

Table S7 Straw-to-product ratio, dry matter fraction, and combustion efficiency for biomass burning (Zhou et al., 2017).

| Crop type  | Straw-to-product ratio (R) | dry matter fraction (D) | combustion efficiency (C) |
|------------|----------------------------|-------------------------|---------------------------|
| Rice       | 1.323                      | 0.89                    | 0.93                      |
| Wheat      | 1.3                        | 0.89                    | 0.83                      |
| Corn       | 1.269                      | 0.87                    | 0.92                      |
| Bean       | 1.6                        | 0.91                    | 0.68                      |
| Potato     | 0.5                        | 0.45                    | 0.68                      |
| Cotton     | 3                          | 0.83                    | 0.9                       |
| Peanut     | 1.5                        | 0.94                    | 0.82                      |
| Rapeseed   | 1.5                        | 0.83                    | 0.9                       |
| Sesame     | 2.2                        | 0.83                    | 0.9                       |
| Hemp       | 1.7                        | 0.83                    | 0.9                       |
| Sugar cane | 0.3                        | 0.45                    | 0.68                      |
| Sugar beet | 0.1                        | 0.45                    | 0.9                       |



Table S8 Percentage of biomass domestic burning and open burning by province

| Province       | Percentage of domestic burning<br>(Zhou et al., 2017; Liu et al., 2022) | Percentage of open burning<br>(Zhou et al., 2017) |
|----------------|-------------------------------------------------------------------------|---------------------------------------------------|
| Beijing        | 0.0063                                                                  | 0.0190                                            |
| Tianjin        | 0.0061                                                                  | 0.2003                                            |
| Hebei          | 0.0424                                                                  | 0.2547                                            |
| Shanxi         | 0.0605                                                                  | 0.2794                                            |
| Inner Mongolia | 0.0265                                                                  | 0.3542                                            |
| Liaoning       | 0.2068                                                                  | 0.2781                                            |
| Jilin          | 0.1602                                                                  | 0.6398                                            |
| Heilongjiang   | 0.2194                                                                  | 0.5806                                            |
| Shanghai       | 0.0089                                                                  | 0.0173                                            |
| Jiangsu        | 0.2263                                                                  | 0.0237                                            |
| Zhejiang       | 0.0171                                                                  | 0.2579                                            |
| Anhui          | 0.1152                                                                  | 0.0334                                            |
| Fujian         | 0.0118                                                                  | 0.1955                                            |
| Jiangxi        | 0.0876                                                                  | 0.7124                                            |
| Shandong       | 0.0548                                                                  | 0.0883                                            |
| Henan          | 0.1210                                                                  | 0.0276                                            |
| Hubei          | 0.0670                                                                  | 0.3252                                            |
| Hunan          | 0.1105                                                                  | 0.1820                                            |
| Guangdong      | 0.0143                                                                  | 0.3626                                            |
| Guangxi        | 0.0718                                                                  | 0.2236                                            |
| Hainan         | 0.0390                                                                  | 0.7610                                            |
| Chongqing      | 0.1048                                                                  | 0.2988                                            |
| Sichuan        | 0.1228                                                                  | 0.1057                                            |
| Guizhou        | 0.2392                                                                  | 0.3480                                            |
| Yunnan         | 0.1742                                                                  | 0.1315                                            |
| Xizang         | 0.1071                                                                  | 0.1537                                            |
| Shaanxi        | 0.0453                                                                  | 0.1421                                            |
| Gansu          | 0.1334                                                                  | 0.3633                                            |
| Qinghai        | 0.0733                                                                  | 0.1616                                            |
| Ningxia        | 0.1400                                                                  | 0.0393                                            |
| Xinjiang       | 0.1641                                                                  | 0.0325                                            |

Table S9 Emission factors for biomass burning (Yi et al., 2021).

| Crop type      | pCl Emission Factors (g/kg) |
|----------------|-----------------------------|
| Rice straw     | 0.4635                      |
| Wheat straw    | 0.5271                      |
| Corn straw     | 0.4146                      |
| Bean straw     | 0.233                       |
| Rapeseed straw | 0.246                       |
| Other straw    | 0.37684                     |
| Firewood       | 0.16                        |

Table S10 Parameters of emission factors for cooking.

| Source category | Number of                    | Smoke discharge (m <sup>3</sup> /h) <sup>b</sup> | Cooking time (h/d) <sup>b</sup> | Day (d) <sup>b</sup> | PM <sub>2.5</sub> Emission Factors (mg/m <sup>3</sup> ) <sup>b</sup> | Removal rate (%) <sup>b</sup> | Percentage of domestic burning (%) <sup>c</sup> |       |
|-----------------|------------------------------|--------------------------------------------------|---------------------------------|----------------------|----------------------------------------------------------------------|-------------------------------|-------------------------------------------------|-------|
| Household       | heats <sup>a</sup>           | 600                                              | 0.5                             | 360                  | 1.32                                                                 | 30                            | 1.545                                           |       |
|                 | Small and medium-sized (80%) | 2000                                             | 4                               | 360                  | 0.68                                                                 | 30                            | 1.545                                           |       |
| Restaurant      | Large-sized (20%)            | 2000                                             | 4                               | 360                  | 0.68                                                                 | 30                            | 1.545                                           |       |
|                 | Middle school                | Student                                          | 2000/150 (people)               | 6                    | 300                                                                  | 1.32                          | 30                                              | 1.545 |
|                 |                              | Teaching staff                                   | 2000/150 (people)               | 1.5                  | 300                                                                  | 1.32                          | 30                                              | 1.545 |
|                 | University                   | Student                                          | 2000/150 (people)               | 6                    | 200                                                                  | 1.32                          | 30                                              | 1.545 |
|                 |                              | Teaching staff                                   | 2000/150 (people)               | 1.5                  | 200                                                                  | 1.32                          | 30                                              | 1.545 |
|                 | Unit                         | 1                                                | 2000                            | 1.5                  | 240                                                                  | 1.32                          | 30                                              | 1.545 |

<sup>a</sup> Wu et al. (2018) and Sepa (2001); <sup>b</sup> Wu et al. (2018); <sup>c</sup> Li et al. (2018).

Table S11 Emission factors of Cl<sub>2</sub> and HOCl.

| Sub-category          | Thi-category          | Chlorine dose (mg/L) | Free chlorine (mg/L) | Cl volatilization rate | Reference                              |
|-----------------------|-----------------------|----------------------|----------------------|------------------------|----------------------------------------|
| Cooling tower         |                       | 1                    | 0                    | 1                      | Wong et al. (2017); Wang et al. (2002) |
| Water treatment       |                       | 2.30                 | --                   | 0.2                    | Li et al. (2020); Wong et al. (2017)   |
| Waste water treatment | Medical sewage        | 10.48                | 0                    | 0.2                    | Li et al. (2020); Wong et al. (2017)   |
|                       | Domestic sewage       | 2.93                 | 0                    | 0.2                    | Li et al. (2020); Wong et al. (2017)   |
| Swimming pool         | Indoor swimming pool  | 1.89                 | 0                    | 0.2                    | Wong et al. (2017); Wang et al., 2002) |
|                       | Outdoor swimming pool | 1.19                 | 0                    | 0.2                    | Wong et al. (2017); Wang et al., 2002) |
| Tap water use         | Car washing           | --                   | 0                    | 1                      | Li et al. (2020); Wong et al. (2017)   |
|                       | Lawn watering         | --                   | 0                    | 1                      | Li et al. (2020); Wong et al. (2017)   |
|                       | Road watering         | --                   | 0                    | 1                      | Li et al. (2020); Wong et al. (2017)   |
|                       | Water leakage         | --                   | 0                    | 0.1                    | Li et al. (2020); Wong et al. (2017)   |

Table S12 Residual chlorine content in tap water. Data are collected from the website of water bureau for each province.

| Province       | Residual chlorine at the end of the pipeline network (mg/L) |
|----------------|-------------------------------------------------------------|
| Beijing        | 0.18                                                        |
| Tianjin        | 0.51                                                        |
| Hebei          | 0.31                                                        |
| Shanxi         | 0.24                                                        |
| Inner Mongolia | 0.37                                                        |
| Liaoning       | 0.39                                                        |
| Jilin          | 0.06                                                        |
| Heilongjiang   | 0.24                                                        |
| Shanghai       | 0.77                                                        |
| Jiangsu        | 0.31                                                        |
| Zhejiang       | 0.46                                                        |
| Anhui          | 0.45                                                        |
| Fujian         | 0.33                                                        |
| Jiangxi        | 0.35                                                        |
| Shandong       | 0.19                                                        |
| Henan          | 0.28                                                        |
| Hubei          | 0.49                                                        |
| Hunan          | 0.30                                                        |
| Guangdong      | 0.44                                                        |
| Guangxi        | 0.51                                                        |
| Hainan         | 0.07                                                        |
| Chongqing      | 0.68                                                        |
| Sichuan        | 0.44                                                        |
| Guizhou        | 0.29                                                        |
| Yunnan         | 0.25                                                        |
| Xizang         | 0.51                                                        |
| Shaanxi        | 0.31                                                        |
| Gansu          | 0.37                                                        |
| Qinghai        | 0.16                                                        |
| Ningxia        | 0.06                                                        |
| Xinjiang       | 0.47                                                        |

Table S13 Size of swimming pool (Li et al., 2020).

| Size Type  | Standard swimming pool | Semi standard and non-standard swimming pools |
|------------|------------------------|-----------------------------------------------|
| Length (m) | 50                     | 25                                            |
| Width (m)  | 21                     | 21                                            |
| Depth (m)  | 1.8                    | 1.8                                           |

Table S14 Parameters of breeding disinfection (Li et al., 2020).

| Breeding type | Breeding density<br>(m <sup>2</sup> /per) | Disinfectant usage per<br>unit area (g/m <sup>2</sup> ) | Disinfection<br>frequency (times/year) | Chlorine volatilization<br>rate |
|---------------|-------------------------------------------|---------------------------------------------------------|----------------------------------------|---------------------------------|
| Livestock     | 1.2                                       | 1.05                                                    | 52                                     | 0.3                             |
| Poultry       | 0.05                                      | 1.05                                                    | 52                                     | 0.3                             |
| Aquaculture   | -                                         | 0.31                                                    | 18                                     | 0.2                             |

Table S15 Water consumption and frequency of car washing.

| Car type          |                        | Water consumption (m <sup>3</sup> ·(vehicle·time) <sup>-1</sup> ) <sup>a</sup> | Frequency (year <sup>-1</sup> ) |
|-------------------|------------------------|--------------------------------------------------------------------------------|---------------------------------|
| Passenger vehicle | Micro and small scale  | 0.05                                                                           | 52                              |
|                   | Medium and large scale | 0.1                                                                            | 365 <sup>b</sup>                |
| Cargo vehicle     | Micro and small scale  | 0.05                                                                           | 52                              |
|                   | Medium and large scale | 0.1                                                                            | 52                              |
| Other vehicle     |                        | 0.05                                                                           | 52                              |

a Sun et al. (2018); b <https://auto.ifeng.com/roll/20111209/727919.shtml>;



Table S16 Sources of spatial allocation factors

| Sector                            | Sub-sector                        | Thi-sector                 | Four-sector                 | Resolution     | Space allocation factor                                                                                                                                                                                                                                                                       |                |                                               |
|-----------------------------------|-----------------------------------|----------------------------|-----------------------------|----------------|-----------------------------------------------------------------------------------------------------------------------------------------------------------------------------------------------------------------------------------------------------------------------------------------------|----------------|-----------------------------------------------|
| Power                             | Power coal combustion             | Power plant                |                             | Point          | Location of thermal power plants (WRI dataset<br><a href="https://datasets.wri.org/dataset/globalpowerplantdatabase">https://datasets.wri.org/dataset/globalpowerplantdatabase</a> )                                                                                                          |                |                                               |
|                                   |                                   | Heat supply                |                             | Point          | Location of heating enterprises ( <a href="http://www.sz-w.com/hyqym1.php">http://www.sz-w.com/hyqym1.php</a> )                                                                                                                                                                               |                |                                               |
| Industry                          | Industrial coal combustion        | Industry                   |                             | Area (1km×1km) | Total population data (LandScan 2019)                                                                                                                                                                                                                                                         |                |                                               |
|                                   |                                   | Construction industry      |                             | Area (1km×1km) | Total population data (LandScan 2019)                                                                                                                                                                                                                                                         |                |                                               |
|                                   |                                   | Cement production          |                             | Point          | Location of cement enterprise ( <a href="http://www.sz-w.com/hyqym1.php">http://www.sz-w.com/hyqym1.php</a> )                                                                                                                                                                                 |                |                                               |
|                                   |                                   | Iron production            |                             | Point          | Location of metallurgical enterprises ( <a href="http://www.sz-w.com/hyqym1.php">http://www.sz-w.com/hyqym1.php</a> )                                                                                                                                                                         |                |                                               |
|                                   |                                   | Steel production           |                             | Point          | Location of metallurgical enterprises ( <a href="http://www.sz-w.com/hyqym1.php">http://www.sz-w.com/hyqym1.php</a> )                                                                                                                                                                         |                |                                               |
|                                   |                                   | HCl production             |                             | Point          | Location of chemical enterprises ( <a href="http://www.sz-w.com/hyqym1.php">http://www.sz-w.com/hyqym1.php</a> )                                                                                                                                                                              |                |                                               |
|                                   |                                   | Flat glass production      |                             | Point          | Location of glass enterprises ( <a href="http://www.sz-w.com/hyqym1.php">http://www.sz-w.com/hyqym1.php</a> )                                                                                                                                                                                 |                |                                               |
|                                   |                                   | Cooling tower              |                             | Point          | Location of thermal power plants (WRI dataset<br><a href="https://datasets.wri.org/dataset/globalpowerplantdatabase">https://datasets.wri.org/dataset/globalpowerplantdatabase</a> ) and chemical enterprises ( <a href="http://www.sz-w.com/hyqym1.php">http://www.sz-w.com/hyqym1.php</a> ) |                |                                               |
|                                   |                                   | Residential                | Residential coal combustion | Residents      |                                                                                                                                                                                                                                                                                               | Area (1km×1km) | Total population data (LandScan 2019)         |
|                                   |                                   |                            |                             | Traffic        |                                                                                                                                                                                                                                                                                               | Area (1km×1km) | Total population data (LandScan 2019)         |
| Business                          |                                   |                            |                             | Area (1km×1km) | Total population data (LandScan 2019)                                                                                                                                                                                                                                                         |                |                                               |
| Other                             |                                   |                            |                             | Area (1km×1km) | Total population data (LandScan 2019)                                                                                                                                                                                                                                                         |                |                                               |
| Water treatment                   |                                   |                            |                             | Point          | Location of water plants ( <a href="http://www.sz-w.com/hyqym1.php">http://www.sz-w.com/hyqym1.php</a> )                                                                                                                                                                                      |                |                                               |
| Waste water treatment             | Domestic sewage                   |                            |                             | Point          | Location of sewage-treatment plants ( <a href="https://www.dowater.com">https://www.dowater.com</a> )                                                                                                                                                                                         |                |                                               |
| Residential usage of disinfectant | Residential usage of disinfectant |                            |                             | Swimming pool  | Public swimming pool                                                                                                                                                                                                                                                                          | Point          | Location of hospitals (Gaode's 2019 POI data) |
|                                   |                                   | Environmental disinfection | Hospital                    | Point          | Location of hospitals (Gaode's 2019 POI data)                                                                                                                                                                                                                                                 |                |                                               |
|                                   |                                   |                            | Toilet-Public toilet        | Point          | Location of public toilets (Gaode's 2019 POI data)                                                                                                                                                                                                                                            |                |                                               |

|                 |                              |                            |                        |                |                                                                                                                                                                          |
|-----------------|------------------------------|----------------------------|------------------------|----------------|--------------------------------------------------------------------------------------------------------------------------------------------------------------------------|
|                 |                              | Tap water use              | Toilet-Domestic toilet | Area (1km×1km) | Total population data (LandScan 2019)                                                                                                                                    |
|                 |                              |                            | Car washing            | Point          | Location of car washing stations (Gaode's 2019 POI data)                                                                                                                 |
|                 |                              |                            | Lawn watering          | Area (1km×1km) | Urban population data (LandScan 2019)                                                                                                                                    |
|                 |                              |                            | Road watering          | Area (1km×1km) | Urban population data (LandScan 2019)                                                                                                                                    |
|                 |                              |                            | Water leakage          | Area (1km×1km) | Total population data (LandScan 2019)                                                                                                                                    |
|                 | Waste incineration station   |                            |                        | Point          | Location of waste incineration stations (Information Platform for Municipal Solid Waste Incineration <a href="http://www.waste-cwin.org">www.waste-cwin.org</a> )        |
|                 | Waste incineration           | WSM open burning           |                        | Area (1km×1km) | Rural population data (LandScan 2019)                                                                                                                                    |
|                 |                              | Medical waste incineration |                        | Point          | Location of hospitals (Gaode's 2019 POI data)                                                                                                                            |
|                 |                              | Household                  |                        | Area (1km×1km) | Total population data (LandScan 2019)                                                                                                                                    |
|                 |                              | Restaurant                 |                        | Area (1km×1km) | Total population data (LandScan 2019)                                                                                                                                    |
|                 | Cooking                      | Canteen                    | School                 | Area (1km×1km) | Total population data (LandScan 2019)                                                                                                                                    |
|                 |                              |                            | Unit                   | Area (1km×1km) | Total population data (LandScan 2019)                                                                                                                                    |
|                 |                              |                            |                        | Area (1km×1km) | Rural population data (LandScan 2019)                                                                                                                                    |
| Agriculture     | Agricultural coal combustion |                            |                        |                |                                                                                                                                                                          |
|                 |                              | Livestock                  |                        | Point          | Location of poultry breeding bases (Gaode's 2019 POI data)                                                                                                               |
|                 |                              | Poultry                    |                        | Point          | Location of poultry breeding bases (Gaode's 2019 POI data)                                                                                                               |
|                 |                              | Aquaculture                |                        | Point          | Location of fisheries (Gaode's 2019 POI data)                                                                                                                            |
|                 |                              | Insecticide                |                        | Area (1km×1km) | Rural population data (LandScan 2019)                                                                                                                                    |
|                 |                              | Herbicide                  |                        | Area (1km×1km) | Rural population data (LandScan 2019)                                                                                                                                    |
|                 |                              | Crop                       |                        | Area (1km×1km) | Rural population data (LandScan 2019)                                                                                                                                    |
|                 |                              | Firewood                   |                        | Area (1km×1km) | Rural population data (LandScan 2019)                                                                                                                                    |
|                 |                              |                            |                        | Point          | Fire location and fire radiation power over crop land from the MODIS satellite fire point data ( <a href="https://modis.gsfc.nasa.gov">https://modis.gsfc.nasa.gov</a> ) |
| Biomass burning | Biomass household burning    |                            |                        |                |                                                                                                                                                                          |
|                 | Biomass open burning         |                            |                        | Point          |                                                                                                                                                                          |

Table S17 Monthly allocation factors.

| Source category                          | Sub-category                             | Month |       |       |      |       |       |       |       |       |      |       |       |
|------------------------------------------|------------------------------------------|-------|-------|-------|------|-------|-------|-------|-------|-------|------|-------|-------|
|                                          |                                          | 1     | 2     | 3     | 4    | 5     | 6     | 7     | 8     | 9     | 10   | 11    | 12    |
| Coal combustion                          | Power plant                              | 8.7%  | 7.8%  | 8.1%  | 7.6% | 7.5%  | 7.9%  | 8.9%  | 9.2%  | 8.1%  | 7.8% | 8.5%  | 9.9%  |
|                                          | Heat supply                              | 25.8% | 23.3% | 12.5% | 0.0% | 0.0%  | 0.0%  | 0.0%  | 0.0%  | 0.0%  | 0.0% | 12.5% | 25.8% |
|                                          | Industrial process <sup>a</sup>          | 7.1%  | 6.5%  | 7.9%  | 8.2% | 8.1%  | 8.7%  | 8.2%  | 8.4%  | 8.9%  | 8.7% | 9.2%  | 10.1% |
| Residential coal combustion <sup>a</sup> | Residential coal combustion <sup>a</sup> | 9.5%  | 10.1% | 9.6%  | 8.5% | 8.3%  | 7.5%  | 7.7%  | 7.7%  | 7.5%  | 7.8% | 7.5%  | 8.3%  |
|                                          | Other coal combustion                    | 8.5%  | 7.7%  | 8.5%  | 8.2% | 8.5%  | 8.2%  | 8.5%  | 8.5%  | 8.2%  | 8.2% | 8.2%  | 8.5%  |
|                                          | Cement production                        | 4.8%  | 4.3%  | 7.7%  | 9.2% | 9.8%  | 9.0%  | 9.0%  | 9.1%  | 9.4%  | 9.4% | 9.7%  | 8.6%  |
| Industrial production process            | Iron production                          | 8.2%  | 7.4%  | 8.2%  | 8.6% | 8.9%  | 8.7%  | 8.4%  | 8.8%  | 8.3%  | 8.1% | 8.0%  | 8.3%  |
|                                          | Steel production                         | 7.9%  | 7.1%  | 8.1%  | 8.6% | 9.0%  | 8.8%  | 8.6%  | 8.8%  | 8.3%  | 8.2% | 8.1%  | 8.5%  |
|                                          | HCl production                           | 7.1%  | 6.5%  | 7.9%  | 8.2% | 8.1%  | 8.7%  | 8.2%  | 8.4%  | 8.9%  | 8.7% | 9.2%  | 10.1% |
| Waste incineration <sup>b</sup>          | Flat glass production                    | 8.0%  | 7.2%  | 8.2%  | 8.4% | 8.4%  | 8.8%  | 8.4%  | 8.5%  | 8.6%  | 8.5% | 8.3%  | 8.7%  |
|                                          | Restaurant                               | 8.4%  | 8.9%  | 7.5%  | 6.6% | 6.8%  | 8.7%  | 10.1% | 9.7%  | 8.0%  | 8.5% | 8.3%  | 8.4%  |
|                                          | Except restaurant <sup>d</sup>           | 8.2%  | 7.4%  | 7.3%  | 7.0% | 7.8%  | 8.0%  | 7.8%  | 8.3%  | 8.1%  | 9.3% | 10.6% | 10.3% |
| Disinfectant                             | Cooling tower                            | 9.2%  | 9.4%  | 8.5%  | 8.5% | 8.5%  | 7.2%  | 6.6%  | 6.6%  | 8.5%  | 8.5% | 8.5%  | 10.0% |
|                                          | Water treatment <sup>e</sup>             | 8.7%  | 7.8%  | 8.1%  | 7.6% | 7.5%  | 7.9%  | 8.9%  | 9.2%  | 8.1%  | 7.8% | 8.5%  | 9.9%  |
|                                          | Waste water treatment <sup>e</sup>       | 7.5%  | 6.9%  | 8.0%  | 8.0% | 8.4%  | 8.3%  | 9.0%  | 9.3%  | 8.8%  | 8.9% | 8.4%  | 8.5%  |
| Pesticide                                | Swimming pool                            | 7.5%  | 6.9%  | 8.0%  | 8.0% | 8.4%  | 8.3%  | 9.0%  | 9.3%  | 8.8%  | 8.9% | 8.4%  | 8.5%  |
|                                          | Environmental disinfection               | 3.4%  | 3.1%  | 3.4%  | 3.3% | 10.8% | 18.0% | 18.6% | 18.6% | 10.7% | 3.4% | 3.3%  | 3.4%  |
|                                          | Tap water use <sup>e</sup>               | 8.5%  | 7.7%  | 8.5%  | 8.2% | 8.5%  | 8.2%  | 8.5%  | 8.5%  | 8.2%  | 8.5% | 8.2%  | 8.5%  |
| Pesticide                                | Tap water use <sup>e</sup>               | 7.5%  | 6.9%  | 8.0%  | 8.0% | 8.4%  | 8.3%  | 9.0%  | 9.3%  | 8.8%  | 8.9% | 8.4%  | 8.5%  |
|                                          | Pesticide                                | 7.8%  | 7.0%  | 9.4%  | 8.5% | 8.7%  | 8.8%  | 8.3%  | 7.6%  | 7.8%  | 7.8% | 8.2%  | 10.2% |

<sup>a</sup> Hong et al. (2020); <sup>b</sup> Wang et al. (2021); <sup>c</sup> Wu (2009); <sup>d</sup> Wu et al. (2018); <sup>e</sup> Wang et al. (2007).

Table S18 Variation coefficient of activity data.

| Source category               |                                           | Distribution type | Variation coefficient | Reference                                               |
|-------------------------------|-------------------------------------------|-------------------|-----------------------|---------------------------------------------------------|
| Coal combustion               | Coal consumption of power plant           | Normal            | 5%                    | Fu et al. (2018); Yi et al. (2021)                      |
|                               | Coal consumption for heat supply          | Normal            | 5%                    | Fu et al. (2018); Yi et al. (2021)                      |
|                               | Coal consumption of industry              | Normal            | 10%                   | Fu et al. (2018); Yi et al. (2021)                      |
|                               | Coal consumption of residents             | Normal            | 20%                   | Fu et al. (2018); Yi et al. (2021)                      |
|                               | Coal consumption of traffic               | Normal            | 30%                   | Fu et al. (2018); Yi et al. (2021)                      |
|                               | Coal consumption of business              | Normal            | 30%                   | Fu et al. (2018); Yi et al. (2021)                      |
|                               | Coal consumption of construction industry | Normal            | 30%                   | Fu et al. (2018); Yi et al. (2021)                      |
|                               | Coal consumption of agriculture           | Normal            | 30%                   | Fu et al. (2018); Yi et al. (2021)                      |
|                               | Coal consumption of other                 | Normal            | 30%                   | Fu et al. (2018); Yi et al. (2021)                      |
| Industrial production process | Production of cement                      | Normal            | 10%                   | Fu et al. (2018); Yi et al. (2021)                      |
|                               | Production of iron                        | Normal            | 10%                   | Yi et al. (2021)                                        |
|                               | Production of steel                       | Normal            | 10%                   | Yi et al. (2021)                                        |
|                               | Production of hydrochloric acid           | Normal            | 20%                   | Fu et al. (2018); Yi et al. (2021)                      |
|                               | Production of flat glass                  | Normal            | 10%                   | Fu et al. (2018); Yi et al. (2021)                      |
| Waste incineration            | Amount of MSW incineration station        | Normal            | 10%                   | Fu et al. (2018); Yi et al. (2021)                      |
|                               | Amount of MSW open incineration           | Normal            | 30%                   | Fu et al. (2018); Yi et al. (2021)                      |
| Biomass burning               | Biomass combustion                        | Normal            | 20%                   | Fu et al. (2018); Yi et al. (2021)                      |
| Cooking                       | Household                                 | Normal            | 20%                   | Zheng et al. (2022)                                     |
|                               | Restaurant                                | Normal            | 30%                   | Zheng et al. (2022)                                     |
|                               | Canteen                                   | Normal            | 10%                   | Zheng et al. (2022)                                     |
| Cooling tower                 | Supplementary water volume                | Normal            | 30%                   | Yi et al. (2021); Li et al. (2020); Zheng et al. (2022) |
| Water treatment               | Treatment water volume                    | Normal            | 10%                   | Yi et al. (2021)                                        |
| Waste water treatment         | Domestic sewage treatment volume          | Normal            | 10%                   | Yi et al. (2021)                                        |
|                               | medical wastewater treatment volume       | Normal            | 30%                   | Yi et al. (2021)                                        |
| Swimming pool                 | Number of swimming pools                  | Normal            | 30%                   | Li et al. (2020)                                        |
|                               | Volume of pools                           | Normal            | 50%                   | Li et al. (2020)                                        |
| Tap water use                 | Tap water consumption                     | Normal            | 50%                   | Li et al. (2020)                                        |
| Environmental disinfection    | Disinfectant usage                        | Normal            | 50%                   | Li et al. (2020)                                        |
| Pesticide                     | Usage of disinfectants                    | Normal            | 40%                   | Yi et al. (2021)                                        |

Table S19 Variation coefficient of emission factors.

| Parameter                                |                                        | Distribution | Variation coefficient | Reference                          |
|------------------------------------------|----------------------------------------|--------------|-----------------------|------------------------------------|
| Coal combustion                          |                                        |              |                       |                                    |
| Cl release ratio                         | Pulverized coal boiler                 | Uniform      | 78%, 98.5%            | Fu et al. (2018); Yi et al. (2021) |
|                                          | Stoker furnace                         | Uniform      | 75%, 99%              | Fu et al. (2018); Yi et al. (2021) |
|                                          | Circulating fluidized bed boiler       | Uniform      | 86%, 99.6%            | Fu et al. (2018); Yi et al. (2021) |
|                                          | Traditional stove                      | Normal       | 50%                   | Yi et al. (2021)                   |
|                                          | Strengthen stove                       | Normal       | 50%                   | Yi et al. (2021)                   |
|                                          | Tea bath                               | Normal       | 50%                   | Zheng et al. (2022)                |
| Removal efficiency                       | Wet scrubber                           | Uniform      | 40%, 60%              | Fu et al. (2018); Yi et al. (2021) |
|                                          | FF                                     | Uniform      | 9.5%, 11.3%           | Fu et al. (2018); Yi et al. (2021) |
|                                          | ESP                                    | Uniform      | 0.9%, 12%             | Fu et al. (2018); Yi et al. (2021) |
|                                          | Mechanical dedusting                   | Uniform      | 16.8%, 27.8%          | Fu et al. (2018); Yi et al. (2021) |
|                                          | Wet desulfurization                    | Uniform      | 93%, 99.4%            | Fu et al. (2018); Yi et al. (2021) |
|                                          | Other desulfurization                  | Uniform      | 85%, 94%              | Fu et al. (2018); Yi et al. (2021) |
| Cl content in coal                       | Cl content in coal                     | Lognormal    | 50%                   | Fu et al. (2018)                   |
| Industrial production process            |                                        |              |                       |                                    |
| HCl emission factor                      | Cement production                      | Lognormal    | 10%                   | Yi et al. (2021)                   |
|                                          | Iron production                        | Lognormal    | 50%                   | Fu et al. (2018); Yi et al. (2021) |
|                                          | Steel production                       | Lognormal    | 50%                   | Fu et al. (2018); Yi et al. (2021) |
|                                          | HCl production                         | Lognormal    | 30%                   | Yi et al. (2021)                   |
| PM <sub>2.5</sub> emission factor        | Cement production                      | Lognormal    | 50%                   | Zheng et al. (2022)                |
|                                          | Iron production                        | Lognormal    | 50%                   | Zheng et al. (2022)                |
|                                          | Steel production                       | Lognormal    | 50%                   | Zheng et al. (2022)                |
|                                          | Flat glass production                  | Lognormal    | 50%                   | Zheng et al. (2022)                |
| Fine particle Cl <sup>-</sup> percentage | Cement production                      | Uniform      | 0.3%, 1.92%           | Yi et al. (2021)                   |
|                                          | Iron production                        | Uniform      | 0.74%, 8.37%          | Yi et al. (2021)                   |
|                                          | Steel production                       | Uniform      | 0.74%, 8.37%          | Yi et al. (2021)                   |
|                                          | Flat glass production                  | Lognormal    | 50%                   | Zheng et al. (2022)                |
| Flat glass production                    | Reference air displacement             | Lognormal    | 50%                   | Zheng et al. (2022)                |
|                                          | HCl emission concentration             | Lognormal    | 50%                   | Zheng et al. (2022)                |
|                                          | Cl <sub>2</sub> emission concentration | Lognormal    | 50%                   | Zheng et al. (2022)                |
| Waste incineration                       |                                        |              |                       |                                    |
| HCl emission factor                      | Incineration station                   | Lognormal    | 50%                   | Zheng et al. (2022)                |
|                                          | Open burning                           | Lognormal    | 50%                   | Fu et al. (2018)                   |
| PM <sub>2.5</sub> emission factor        | Incineration station                   | Lognormal    | 50%                   | Zheng et al. (2022)                |
|                                          | Open burning                           | Lognormal    | 50%                   | Zheng et al. (2022)                |
| Fine particle Cl <sup>-</sup> percentage | Incineration station                   | Lognormal    | 50%                   | Fu et al. (2018)                   |
|                                          | Open burning                           | Lognormal    | 50%                   | Fu et al. (2018)                   |
| Biomass burning                          |                                        |              |                       |                                    |
| HCl emission factor                      | Rice straw (g/kg)                      | Uniform      | 0.0393, 0.8065        | Yi et al. (2021)                   |
|                                          | Wheat straw (g/kg)                     | Uniform      | 0.0201, 1.0034        | Yi et al. (2021)                   |
|                                          | Other crop straw                       | Lognormal    | 50%                   | Yi et al. (2021)                   |
|                                          | Firewood (g/kg)                        | Uniform      | 0.0376, 0.087         | Yi et al. (2021)                   |
| Cl <sup>-</sup> emission factor          | Rice straw (g/kg)                      | Uniform      | 0.187, 0.83           | Yi et al. (2021)                   |
|                                          | Wheat straw (g/kg)                     | Uniform      | 0.1317, 0.939         | Yi et al. (2021)                   |
|                                          | Corn straw (g/kg)                      | Uniform      | 0.059, 1.026          | Yi et al. (2021)                   |

|                                          |                   |           |              |                                                            |
|------------------------------------------|-------------------|-----------|--------------|------------------------------------------------------------|
|                                          | Bean straw (g/kg) | Uniform   | 0.068, 0.361 | Yi et al. (2021)                                           |
|                                          | Rapeseed straw    | Lognormal | 50%          | Yi et al. (2021)                                           |
|                                          | Other straw       | Lognormal | 50%          | Yi et al. (2021)                                           |
|                                          | Firewood (g/kg)   | Uniform   | 0.086, 0.276 | Yi et al. (2021)                                           |
| <hr/>                                    |                   |           |              |                                                            |
| Cooking                                  |                   |           |              |                                                            |
| PM <sub>2.5</sub> emission factor        | Cooking           | Lognormal | 50%          | Zheng et al. (2022)                                        |
| Fine particle Cl <sup>-</sup> percentage | Cooking           | Lognormal | 20%          | Yi et al. (2021)                                           |
| <hr/>                                    |                   |           |              |                                                            |
| Cooling tower                            |                   |           |              |                                                            |
| Cl <sub>2</sub> /HOCl emission factor    | Cooling tower     | Lognormal | 50%          | Yi et al. (2021)                                           |
| <hr/>                                    |                   |           |              |                                                            |
| Water treatment                          |                   |           |              |                                                            |
| Cl <sub>2</sub> /HOCl emission factor    | Chlorine dose     | Lognormal | 50%          | Yi et al. (2021); Li et al. (2020)                         |
|                                          | Free chlorine     | Lognormal | 5%           | Yi et al. (2021); Li et al. (2020)                         |
|                                          | Emission factor   | Uniform   | 10%, 30%     | Yi et al. (2021)                                           |
| <hr/>                                    |                   |           |              |                                                            |
| Waste water treatment                    |                   |           |              |                                                            |
| Cl <sub>2</sub> /HOCl emission factor    | Chlorine dose     | Lognormal | 50%          | Yi et al. (2021); Li et al. (2020)                         |
|                                          | Free chlorine     | Lognormal | 30%          | Yi et al. (2021)                                           |
|                                          | Emission factor   | Uniform   | 10%, 30%     | Yi et al. (2021)                                           |
| <hr/>                                    |                   |           |              |                                                            |
| Swimming pool                            |                   |           |              |                                                            |
| Cl <sub>2</sub> /HOCl emission factor    | Chlorine dose     | Lognormal | 50%          | Li et al. (2020)                                           |
| <hr/>                                    |                   |           |              |                                                            |
| Tap water use                            |                   |           |              |                                                            |
| Cl <sub>2</sub> /HOCl emission factor    | Free chlorine     | Lognormal | 10%          | Yi et al. (2021)                                           |
|                                          | Emission factor   | Uniform   | 5%, 15%      | Yi et al. (2021); Li et al. (2020);<br>Zheng et al. (2022) |
| <hr/>                                    |                   |           |              |                                                            |
| Environment disinfectant                 |                   |           |              |                                                            |
| Cl <sub>2</sub> /HOCl emission factor    | Emission factor   | Uniform   | 20%, 40%     | Yi et al. (2021); Li et al. (2020)                         |
| <hr/>                                    |                   |           |              |                                                            |
| Pesticide                                |                   |           |              |                                                            |
| Cl <sub>2</sub> /HOCl emission factor    | Pesticide         | Lognormal | 50%          | Yi et al. (2021); Zheng et al. (2022)                      |

Reference:

- Fu, X., Wang, T., Wang, S. X., Zhang, L., Cai, S. Y., Xing, J., and Hao, J. M.: Anthropogenic Emissions of Hydrogen Chloride and Fine Particulate Chloride in China, *Environ Sci Technol*, 52, 1644-1654, 10.1021/acs.est.7b05030, 2018.
- Fu, Z., Lin, S., Tian, H., Hao, Y., Wu, B., Liu, S., Luo, L., Bai, X., Guo, Z., and Lv, Y.: A comprehensive emission inventory of hazardous air pollutants from municipal solid waste incineration in China, *Sci. Total Environ.*, 826, 154212, <https://doi.org/10.1016/j.scitotenv.2022.154212>, 2022.
- Hong, Y., Liu, Y., Chen, X., Fan, Q., Chen, C., Chen, X., and Wang, M.: The role of anthropogenic chlorine emission in surface ozone formation during different seasons over eastern China, *Sci. Total Environ.*, 723, 137697, <https://doi.org/10.1016/j.scitotenv.2020.137697>, 2020.
- Li, L., Yin, S., Huang, L., Yi, X., Wang, Y., Zhang, K., Ooi, C. G., and Allen, D. T.: An emission inventory for Cl<sub>2</sub> and HOCl in Shanghai, 2017, *Atmos. Environ.*, 223, 117220, <https://doi.org/10.1016/j.atmosenv.2019.117220>, 2020.
- Li, Q., Wu, A., Gong, D., Wang, B., and Luan, S.: Characteristics of PM<sub>2.5</sub> emitted from cooking emissions: a review, *Environmental Science & Technology (in Chinese)*, 41, 41-50, 10.19672/j.cnki.1003-6504.2018.08.008, 2018.
- Liu, Y., Zhao, H., Zhao, G., Zhang, X., and Xiu, A.: Carbonaceous gas and aerosol emissions from biomass burning in China from 2012 to 2021, *J. Clean Prod.*, 362, 132199, <https://doi.org/10.1016/j.jclepro.2022.132199>, 2022.
- National Bureau of Statistics: China Energy Statistical Yearbook (2020), China Statistics Press, Beijing, China, 2020a.
- National Bureau of Statistics: China Statistical Yearbook of Environment (2020), China Statistics Press, Beijing, China, 2020b.
- National Bureau of Statistics: Educational Statistics Yearbook of China, China Statistics Press, Beijing, China, 2020c.
- National Bureau of Statistics: China Rural Statistical Yearbook (2020), China Statistics Press, Beijing, China, 2020d.
- National Bureau of Statistics: China Population & Employment Statistics Yearbook, China Statistics Press, Beijing, China, 2020e.
- National Bureau of Statistics: China Urban-Rural Construction Statistical Yearbook (2020), China Statistics Press, Beijing, China, 2020f.
- National Bureau of Statistics: China Industry Statistical Yearbook (2020), China Statistics Press, Beijing, China, 2020g.
- National Bureau of Statistics: China Statistical Yearbook (2020), China Statistics Press, Beijing, China, 2020h.
- National Health Commission of the People's Republic of China: China Health Statistical Yearbook (2008), Peking Union Medical College Press, Beijing, China 2008.
- National Health Commission of the People's Republic of China: China Health Statistical Yearbook (2020), Peking Union Medical College Press, Beijing, China 2020.
- Pan, Y., Li, N., Zheng, J., Yin, S., Li, C., Yang, J., Zhong, L., Chen, D., Deng, S., and Wang, S.: Emission inventory and characteristics of anthropogenic air pollutant sources in Guangdong Province, *Acta Scientiae Circumstantiae (in Chinese)*,

35, 2655-2669, 10.13671/j.hjkxxb.2014.1058, 2015.

SEPA: Emission Standard of Cooking fume, GB 18483-2001, State Environmental Protection Administration of China (SEPA), 2001.

SEPA: Emission standard of air pollutants for flat glass industry, GB 26453-2011, State Environmental Protection Administration of China (SEPA), 2011.

Stockwell, C. E., Yokelson, R. J., Kreidenweis, S. M., Robinson, A. L., DeMott, P. J., Sullivan, R. C., Reardon, J., Ryan, K. C., Griffith, D. W. T., and Stevens, L.: Trace gas emissions from combustion of peat, crop residue, domestic biofuels, grasses, and other fuels: configuration and Fourier transform infrared (FTIR) component of the fourth Fire Lab at Missoula Experiment (FLAME-4), *Atmos. Chem. Phys.*, 14, 9727-9754, 10.5194/acp-14-9727-2014, 2014.

Sun, C., Jiang, J., and Cui, J.: The enormous potential for water conservation in car washing, *Urban and Rural Construction*, 23, 14-17, 2018.

Wang, G., Zhang, H., Jia, M., and Cheng, W.: Investigation and Analysis on Relevant Factors of Household Domestic Waste Production, *Urban Management and Science and Technology (in Chinese)*, 22, 30-34, 10.16242/j.cnki.umst.2021.01.011, 2021.

Wang, S., Qin, W., Liu, Y., and Wei, S.: An Experimental Study on the Disinfection of Swimming Pool Water with Strong Chlorogen, *China Chlor-Alkali (in Chinese)*, 31-33, 2002.

Wang, X., Zhang, F., Wang, H., Zhu, J., Zhang, C., Cui, Y., and Shu, Y.: Analysis and Research on Emission Concentration of Heavy Metals, Fluorine and Chlorine from Glass Furnaces, *The 18th National Symposium on Sulfur Dioxide, Nitrogen Oxide, Mercury Pollution Prevention and Fine Particulate Matter (PM<sub>2.5</sub>) Treatment Technology*, Luoyang, China2014.

Wang, Y., Wu, X., and Xu, G.: Analysis of change law of water consumption in Guangzhou City, *Water Economics*, 43-45+83, 2007.

Wen, J., Li, B., Zhang, X., Tian, Y., Huang, B., Zhu, H., and Feng, Y.: PM<sub>2.5</sub> Profiles of Typical Industrial Emissions in Yantai City, China, *Research of Environmental Sciences (in Chinese)*, 32, 1333-1339, 10.13198/j.issn.1001-6929.2019.04.06, 2019.

Wiedinmyer, C., Yokelson, R. J., and Gullett, B. K.: Global Emissions of Trace Gases, Particulate Matter, and Hazardous Air Pollutants from Open Burning of Domestic Waste, *Environ Sci Technol*, 48, 9523-9530, 10.1021/es502250z, 2014.

Wong, J. P. S., Carslaw, N., Zhao, R., Zhou, S., and Abbatt, J. P. D.: Observations and impacts of bleach washing on indoor chlorine chemistry, *Indoor Air*, 27, 1082-1090, <https://doi.org/10.1111/ina.12402>, 2017.

Wu, X.: *The Study of Air Pollution Emission Inventory in Yangtze Delta*, Master, Fudan University, 2009.

Wu, X., Chen, W., Wang, K., Xiu, A., Zhang, S., Zhao, H., and Zhang, X.: PM<sub>2.5</sub> and VOCs emission inventories from cooking in Changchun City, *China Environmental Science (in Chinese)*, 38, 2882-2889, 10.19674/j.cnki.issn1000-



6923.2018.0303, 2018.

- Yi, X., Yin, S., Tan, X., Huang, L., Wang, Y., Chen, Y., and Li, L.: Preliminary study on the inventory of sources of hydrogen chloride and particulate chlorine in the atmosphere in Shanghai, *Acta Scientiae Circumstantiae* (in Chinese), 40, 469-478, 10.13671/j.hjkxxb.2019.0376, 2020.
- Yi, X., Yin, S., Huang, L., Li, H., Wang, Y., Wang, Q., Chan, A., Traoré, D., Ooi, M. C. G., Chen, Y., Allen, D. T., and Li, L.: Anthropogenic emissions of atomic chlorine precursors in the Yangtze River Delta region, China, *Sci. Total Environ.*, 771, 144644, <https://doi.org/10.1016/j.scitotenv.2020.144644>, 2021.
- Zhang, B., Shen, H., Yun, X., Zhong, Q., Henderson, B. H., Wang, X., Shi, L., Gunthe, S. S., Huey, L. G., Tao, S., Russell, A. G., and Liu, P.: Global Emissions of Hydrogen Chloride and Particulate Chloride from Continental Sources, *Environ Sci Technol*, 56, 3894-3904, 10.1021/acs.est.1c05634, 2022.
- Zhang, Y.: Present situation of medical waste in Hangzhou and study on its disposal and management system, Zhejiang Gongshang University, 2018.
- Zheng, B., Tong, D., Li, M., Liu, F., Hong, C., Geng, G., Li, H., Li, X., Peng, L., Qi, J., Yan, L., Zhang, Y., Zhao, H., Zheng, Y., He, K., and Zhang, Q.: Trends in China's anthropogenic emissions since 2010 as the consequence of clean air actions, *Atmos. Chem. Phys.*, 18, 14095-14111, 10.5194/acp-18-14095-2018, 2018.
- Zheng, J., Huang, Z., Sha, Q., Zhong, Z., and Xu, Y.: Uncertainty Analysis of Emission Inventory and Chemical Transport Model, Science Press, Beijing, China 2022.
- Zhou, Y., Xing, X., Lang, J., Chen, D., Cheng, S., Wei, L., Wei, X., and Liu, C.: A comprehensive biomass burning emission inventory with high spatial and temporal resolution in China, *Atmos. Chem. Phys.*, 17, 2839-2864, 10.5194/acp-17-2839-2017, 2017.
